1 **Male differentiation in the marine copepod *Oithona nana* reveals the**  
2 **development of a new nervous ganglion linked to Lin12-Notch-Repeat**  
3 **protein-associated proteolysis**

4 Kevin Sugier<sup>1</sup>, kevin.sugier@gmail.com

5 Romuald Laso-Jadart<sup>1</sup>, ljromu@gmail.com

6 Benoit Vacherie<sup>2</sup>, bvacheri@genoscope.cns.fr

7 Jos Käfer<sup>3</sup>, jos.kafer@univ-lyon1.fr

8 Laurie Bertrand<sup>1</sup>, lbertran@genoscope.cns.fr

9 Karine Labadie<sup>2</sup>, klabadie@genoscope.cns.fr

10 Nathalie Martins<sup>1</sup>, nmartins@genoscope.cns.fr

11 Céline Orvain<sup>1</sup>, corvain@genoscope.cns.fr

12 Emmanuelle Petit<sup>2</sup>, mpetit@genoscope.cns.fr

13 Julie Poulain<sup>1</sup>, poulain@genoscope.cns.fr

14 Patrick Wincker<sup>1</sup>, pwincker@genoscope.cns.fr

15 Jean-Louis Jamet<sup>4</sup>, jean-louis.jamet@univ-tln.fr

16 Adriana Alberti<sup>2</sup>, aalberti@genoscope.cns.fr

17 Mohammed-Amin Madoui<sup>1</sup>, amadou@genoscope.cns.fr, corresponding author

18 <sup>1</sup>Génomique Métabolique, Genoscope, Institut François Jacob, CEA, CNRS, Univ Evry, Université Paris-Saclay,  
19 Evry, France

20 <sup>2</sup>Genoscope, Institut de biologie François-Jacob, Commissariat à l'Energie Atomique (CEA), Université Paris-  
21 Saclay, F-91000 Evry, France

22 <sup>3</sup>Université de Lyon, Université Lyon 1, CNRS, Laboratoire de Biométrie et Biologie Evolutive UMR 5558, F-  
23 69622 Villeurbanne, France

24 <sup>4</sup>Université de Toulon, Aix-Marseille Université, CNRS/INSU/IRD, Mediterranean Institute of Oceanography  
25 MIO UMR 7294, EMBIO, CS 60584, 83041 Toulon cedex 9, France



## 27 **Abstract**

28 **Background:** Copepods are among the most numerous animals, and play an essential role in  
29 the marine trophic web and biogeochemical cycles. The genus *Oithona* is described as having  
30 the highest density of copepods, and as being the most cosmopolite copepods. The *Oithona*  
31 male paradox describes the activity states of males, which are obliged to alternate between  
32 immobile and mobile phases for ambush feeding and mate searching, respectively, while the  
33 female is typically less mobile and often feeding. To characterize the molecular basis of this  
34 sexual dimorphism, we combined immunofluorescence, genomics, transcriptomics, and  
35 protein-protein interaction approaches.

36 **Results:** Immunofluorescence of  $\beta$ 3- and  $\alpha$ -tubulin revealed two male-specific nervous  
37 ganglia in the lateral first segment of the *Oithona nana* male's prosome. In parallel,  
38 transcriptomic analysis showed male-specific enrichment for nervous system development-  
39 related transcripts. Twenty-seven Lin12-Notch Repeat domain-containing protein coding  
40 genes (LDPGs) of the 75 LDPGs identified in the genome were specifically expressed only in  
41 males. Furthermore, most of the LDPGs (27%) coded for proteins having predicted  
42 proteolytic activity, and non-LDPG proteolysis-associated transcripts showed a male-specific  
43 enrichment. Using yeast double-hybrid assays, we constructed a protein-protein interaction  
44 network involving two LDPs with proteases, extracellular matrix proteins, and neurogenesis-  
45 related proteins.

46 **Conclusions:** For the first time, our study describes the lateral nervous ganglia of *O. nana*  
47 males, unique to copepods. We also demonstrated a role of LDPGs and their associated  
48 proteolysis in male-specific physiology, and we hypothesize a role of the LDPGs in the  
49 development of the lateral ganglia through directed lysis of the extracellular matrix for the  
50 growth of neurites and genesis of synapses.

51

52

## 53 **Background**

54 Copepods are small planktonic crustaceans that represent the most abundant metazoan  
55 subclass on Earth, and occupy all ecological aquatic niches [1, 2]. Among them, the genus  
56 *Oithona* is described as having the highest numerical density [3], being the most cosmopolitan  
57 [4], and playing a key role as a secondary producer in the marine food web and in  
58 biogeochemical cycles [5]. Due to its importance and abundance, *Oithona* phylogeography,  
59 ecology, behavior, life cycle, anatomy, and genomics are well studied [6–14].

60 *Oithona spp.* are active ambush-feeding omnivores; that is, to feed, the individuals  
61 remain static, jump on prey that come on their range, and capture them with their buccal  
62 appendages [8]. While females spend the majority of time feeding, and are thus mostly  
63 immobile, males actively seek females for mating. The mating success of males thus increases  
64 by being motile and not feeding. Theoretically, to maximize mating success, males have to  
65 alternate feeding and female-searching periods, which constitutes a paradox in the *Oithona*  
66 male behavior [8].

67 We performed a multi-year survey in Little Bay of Toulon, where *O. nana* is the  
68 dominant zooplankton throughout the year with no significant seasonal variation, suggesting  
69 continuous reproduction [15] as observed in other *Oithona* populations [16]. Under laboratory  
70 conditions with the two sexes incubated separately, *O. nana* males have a mean lifetime of 25  
71 days, and females live for approximately 42 days. However, the lifespan *in situ* is unknown,  
72 as is the reproduction rate. Nonetheless, in the case of female saturation, *O. davisae* males  
73 have a reproduction rate of 0.9 females male<sup>-1</sup> day<sup>-1</sup>, depending on the production of  
74 spermatophores that are transferred during mating [8]. A strongly biased sex-ratio toward  
75 females (male/female ratio < 0.22) was observed in the *O. nana* population of Toulon Little  
76 Bay (France) [15]. Several causes could explain this observation; one possibility is the higher  
77 male exposure to predators due to its higher motility, considered as a “risky” behavior [17,

78 18]. However, other possibilities can be proposed, such as environmental sex determination  
79 (ESD) that has been observed in other copepods [19], or energy resource depletion as a  
80 consequence of male energy consumption during the mate search.

81 Recently, the *O. nana* genome was sequenced, and its comparison to other genomes  
82 showed an explosion of Lin12-Notch-Repeat (LNR) domain-containing protein-coding genes  
83 (LDPGs) [9]. Among the LDPGs present in the genome, five were found under natural  
84 selection in Mediterranean Sea populations, including notably one point mutation generating  
85 an amino acid change within the LNR domain of a male-specific protein [9, 20]. This  
86 provided the first evidence of *O. nana* molecular differences between sexes at the  
87 transcriptional level, and a potential new repertoire of candidate genes for functional analysis.

88 To further investigate the molecular basis of *O. nana* sexual differentiation, we used in  
89 this study a multi-approach analysis including, (i) *in situ* sex ratio determination over a  
90 fifteen-year time series, (ii) sexual system determination by sex-specific polymorphism  
91 analysis, (iii) immunofluorescence staining of the nervous system in male and female *O. nana*  
92 copepods, (iv) *in silico* analysis of the structure and evolution of the LDPGs, (v) sex-specific  
93 gene expression through RNA-seq analysis, and (vi) the identification of an LDP protein-  
94 protein interaction network using a yeast two-hybrid system.

95

## 96 **Results**

### 97 **A female-biased sex ratio of *Oithona nana***

98 Between 2002 and 2017, 186 samples were collected in the Toulon Little Bay (Figure 1A),  
99 from which *O. nana* female and male adults were isolated (Figure 1B). Across fifteen years of  
100 observation, we noted minimum male/female ratios in February (0.11), maxima in September,  
101 October, and November (0.17), and a mean sex-ratio of  $0.15 \pm 0.11$  over all years (Figure

102 1C). This monitoring of the sex-ratio showed a strong bias toward females, with relative  
103 stability over the years (ANOVA,  $p = 0.87$ ).

104

### 105 **Central nervous system labelling by immunofluorescence**

106 The central nervous system labeling with  $\beta$ 3-tubulin in *O. nana* (Figure 2A–B) showed the  
107 male-specific presence of a lateral ganglion with a high density of  $\beta$ 3-tubulin in the anterior  
108 part of the ganglion, and a higher density of nuclei in its posterior part. We also observed the  
109 presence of  $\beta$ 3-tubulin-rich post-ganglionic nerves that possibly connect the anterior part of  
110 the lateral ganglion to the tritocerebrum and/or the subesophageal ganglion. Not all males  
111 presented this labeling, and certain males contained one ganglion symmetrically on each side.  
112 However, no females presented this ganglion (Figure 2C). The  $\alpha$ -tubulin labeling showed  
113 about seven to nine parallel afferent nerve fibers on the lateral part of the ganglion (Figure  
114 2D–E) connected to free nerve endings located in the ventral part of the ganglion and in the  
115 external environment. Such labeling was absent in *O. nana* females. Together, these assays  
116 indicated the presence of a new nerve ganglion present only in *O. nana* males, located on the  
117 anterolateral part of the prosome.

118

### 119 **Transcriptomic support for *Oithona nana* male homogamety**

120 To identify the most likely cause of this sex-ratio bias between potential environmental sex  
121 determination (ESD) and higher male mortality, we used SD-pop on four individual  
122 transcriptomes of both sexes to first determine the *O. nana* sexual system. According to SD-  
123 pop, the ZW model was preferred (lowest Bayesian information criterion (BIC)) for *O. nana*.  
124 This result is unlikely to be due to chance, as in none of the runs on the 69 datasets for which  
125 the sex was permuted did the ZW model have the lowest BIC. Eleven genes had a probability

126 of being sex-linked in *O. nana* greater than 0.8; however, none of the SNPs in these genes  
127 showed the typical pattern of a fixed ZW SNP. The four females genotyped were  
128 heterozygous, and the four males were homozygous (except for some SNPs, for which one  
129 male individual was not genotyped), indicating that the recombination suppression between  
130 the gametologs is recent, and that no or few mutations have been fixed independently in both  
131 gametolog copies. Annotation of these eleven genes shows that only one shared homology  
132 with other metazoan genes, that being *ATP5H*, which codes a subunit of the mitochondrial  
133 ATP synthase (Supplementary Notes S5). As in *Drosophila*, *O. nana* *ATP5H* is encoded in  
134 the nucleus [21].

135

### 136 **LNR domains burst in the *O. nana* proteome**

137 To identify LDPs, we developed a HMM dedicated to *O. nana* LNR identification based on  
138 31 conserved amino acid residues. In the *O. nana* proteome, 178 LNR and LNR-like domains  
139 were detected, encoded by 75 LDPGs, while a maximum of eight domains coded by six  
140 LDPGs were detected in four other copepods (Figure 3A–B). Among the 178 *O. nana*  
141 domains, 22 were canonical LNR and 156 were LNR-like domains (Figure 3C). By  
142 comparing the structure of Notch, LNR, and LNR-like domains, we observed the loss of two  
143 cysteines (Figure 3C) in the LNR-like domains. Among the 75 LDPs, we identified nine  
144 different protein structure patterns (Figure 3D), including notably 47 LNR-only proteins, 12  
145 trypsin-associated LDPs, and eight metallopeptidase-associated LDPs. Overall, LDPs were  
146 predicted to contain a maximum of 5 LNR domains and 13 LNR-like domains.

147 Forty-nine LDPs were predicted to be secreted (eLDP), six membranous (mLDPs),  
148 and twenty intracellular (iLDPs) (Supplementary Notes S6). Among the iLDPs, two were  
149 associated with proteolytic domains, three associated with sugar-protein or protein-protein  
150 interaction domains (PAN/Appel, lectin, and ankyrin domains), and 13 (65%) were LNR-only



151 proteins. Among the eLDPs, 18 (37%) contained proteolytic domains corresponding to a  
152 significant enrichment of proteolysis in eLDPs (hypergeometric test,  $p = 2.13e - 17$ ); other  
153 eLDPs corresponded to LNR-only proteins (63%). The mLDPs were represented by one  
154 Notch protein, two proteins with LNR domains associated with lectin or thrombospondin  
155 domains, respectively, and three LNR-only proteins.

156 In phylogenetic trees based on nucleic acid sequences of the LNR and LNR-like  
157 domains (Figure 3E), only 17% of the nodes had support over 90%. Twenty-seven branch  
158 splits corresponded to tandem duplications involving 15 LDPGs, including Notch and a  
159 cluster of five trypsin-associated LDPGs coding three eLDPs and two iLDPs.

#### 160 ***Oithona nana* male gene expression**

161 Among the 15,399 genes predicted in the *O. nana* reference genome, 1,233 (~8%) were  
162 significantly differentially expressed in at least one of the five developmental stages. Among  
163 them, 619 genes were specifically upregulated in one stage, with 53 genes upregulated in the  
164 egg, 19 in nauplii, 75 in copepodids, 27 in adult females, and 445 in adult males (Figure 4A).  
165 The male-upregulated genes were categorized based on their functional annotation (Figure  
166 4B).

167

#### 168 *Upregulation of LNR-coding and proteolytic genes in males*

169 The 1,233 differentially expressed genes contained 27 LDPGs (36% of total LDPGs) (Figure  
170 4C). Of these 27 genes, 18 were specifically upregulated in adult males, producing a  
171 significant and robust enrichment of LDPGs in the adult male transcriptomes (fold change >  
172 8;  $p = 2.95e - 12$ ) (Figure 4C). Among the 445 male-specific genes, 27 were predicted to play  
173 a role in proteolysis, including 16 trypsins with three trypsin-associated LDPGs, showing

174 significant enrichment of trypsin-coding genes in males ( $p = 1.73e - 05$ ), as well as three  
175 metalloproteinases and five proteases inhibitors.

176

177 *Upregulation of nervous system-associated genes in adult males*

178 Forty-eight upregulated genes in males had predicted functions in the nervous system  
179 (Supplementary Notes S7). These included 36 genes related to neuropeptides and hormones,  
180 either through their metabolism (10 genes, seven of which encode enzymes involved in  
181 neuropeptide maturation and one of which is an allatostatin), through their transport and  
182 release (9 genes), or through neuropeptide or hormone receptors (17 genes, seven of which  
183 are FMRF amide receptors). Six genes were predicted to be involved in neuron polarization,  
184 four in the organization and growth guidance of axons and dendrites (including homologs to  
185 *B4GAT1* and zig-like genes), one in the development and maintenance of sensory and motor  
186 neurons (*IMPL2*), and one in synapse formation (*SYG-2*, futsch-like).

187

188 *Upregulation of amino-acid conversion into neurotransmitters in male adults*

189 We observed 10 upregulated genes in males predicted to play a role in amino acid metabolism  
190 (Figure 4D). This includes five enzymes that directly convert lysine, tyrosine, and glutamine  
191 into glutamate through the activity of one  $\alpha$ -amino adipic semialdehyde synthase (AASS), one  
192 tyrosine aminotransferase (TyrAT), and three glutaminases, respectively. Three other  
193 upregulated enzymes play a role in the formation of pyruvate: one alanine dehydrogenase  
194 (AlaDH), one serine dehydrogenase (SDH), and, indirectly, one phosphoglycerate mutase  
195 (PGM). Furthermore, two other upregulated enzymes are involved in the formation of glycine,  
196 one sarcosine dehydrogenase (SARDH) and one betaine-homocysteine methyltransferase  
197 (BHMT) (Figure 3D).

198

199 *Downregulation of food uptake regulation in male adult*

200 Three genes with predicted functions in food uptake regulation showed specific patterns in  
201 males. These included an increase of the mRNA encoding allatostatin, a neuropeptide known  
202 in arthropods to reduce food uptake, but also three male under-expressed genes: a crustacean  
203 cardioactive peptide (CCAP, a neuropeptide that triggers digestive enzymes activation), and  
204 the two bursicon protein subunits, which encode hormones known to be involved in intestinal  
205 and metabolic homeostasis.

206

207 **Protein-protein interaction network involving LDPs and IGFBP**

208 In order to further characterize the role of LDPs, we studied their potential protein interactions  
209 using a yeast two-hybrid system (Y2H). To this end, we selected 11 genes: 7 male-  
210 overexpressed LDPGs, and 4 potential IGFbps. The choice of the IGFbps was made with the  
211 hypothesis that potential insulin-like androgenic gland hormone partners would be found in  
212 decapods [22].

213 We performed Y2H analysis using two different approaches (Supplementary Notes  
214 S3): the first was a matrix-based screen with pairwise interaction assays, and the second  
215 aimed to identify potential interactors in the entire *O. nana* proteome by a random library  
216 screen. This latter screening approach was more time-consuming, and was applied to only a  
217 subset of four genes (two LDPGs and two IGFbps) used as bait proteins against a Y2H  
218 library constructed from *O. nana* cDNAs. Together, these two approaches allowed the  
219 reconstruction of a protein network containing 17 proteins, including two LDPs and one  
220 IGFBP used as baits (Figure 5A) (Supplementary Notes S4), and 14 interacting partners, of

221 which six have orthologs in other metazoans and five have no orthologs, but at least one of  
222 which was detected using the InterProScan domain (Figure 5B).

223 On\_LDP1, a putative extracellular trypsin-containing LDP, was found to form a  
224 homodimer and interact with a trypsin, two extracellular matrix proteins, and also an insulin-  
225 like growth factor binding protein (On\_IGFBP7) that contained a trypsin inhibitor kazal  
226 domain. Based on its phylogeny, this protein is homologous to IGFBP7, also present in  
227 vertebrates (Supplementary Notes S8).

228 On\_IGFBP7 formed a homodimer and interacted with three other proteins: one  
229 spondin-1 like protein (On\_Spon1-like) containing a kazal domain, one thrombospondin  
230 domain-containing protein, and one vitellogenin 2-like protein (On\_Vtg2).

231 On\_LDP2, coded by a gene upregulated in males (Figure 5C), interacted with nine  
232 proteins: one vitellogenin 2-like protein, three uncharacterized proteins, one homolog to  
233 somatomedin-B thrombospondin type 1 domain-containing protein, one homolog to the  
234 neuroendocrine protein 7b2 that contains a secretogranin V-like domain, one wnt5-like  
235 protein, one laminin 1 subunit  $\beta$ , and one furin-like 1 protein. No PPIs with IGF were  
236 detected, and no homologs to insulin-like androgenic gland hormone [22] were found in the  
237 *O. nana* proteome.

238

## 239 **Discussion**

### 240 **ZW sexual system and high mortality rate of *O. nana* males**

241 Over 15 years of sampling, we observed a stable and strongly female-biased sex-ratio (~1:9)  
242 in the Toulon Little Bay. A similar observation on a smaller time scale was previously made  
243 in another *O. nana* population [16] and in 132 other Oithonidae populations [18]. Two main  
244 factors could lead to this sex-ratio: a higher mortality of males, or environmentally-induced

245 sex determination. As we showed in our study, *O. nana* seems to have recently evolved  
246 genetic sex determination of the ZW type; thus, a 1:1 sex-ratio is expected in eggs. Therefore,  
247 a higher mortality rate of males is more likely to explain our *in situ* observations. Moreover,  
248 these results are in accordance with the previously described risky behavior of *Oithona* males,  
249 that is, frequent motion to find females, thus making them more vulnerable to predators than  
250 immobile females [17].

251

252 **The development of a male-specific nervous ganglion is supported by nervous system-**  
253 **gene expression**

254 Immunofluorescence labeling of the *O. nana* nervous system demonstrated the existence of a  
255 ganglion in the anterolateral part of the male prosome.  $\alpha$ -tubulin labeling showed nervous  
256 termination in the external environment, which suggests a sensory role to external cues. These  
257 observations constitute a new nervous and anatomical dimorphism between *O. nana* males  
258 and females [23][24]. The male-specific overexpression of numerous genes involved in the  
259 development of the nervous system supports the development of this male-specific ganglion  
260 at the molecular level, including axon guidance and synapse formation. From the upregulation  
261 of neuronal developmental genes in adult males, especially *syg-2* and *zig-8* normally  
262 expressed during the larval phase [25], we may infer ongoing formation of new axons and/or  
263 dendrites and synapses associated with the male lateral ganglion (Figure 6). *On\_LDPG2*, a  
264 male-overexpressed gene under natural selection in the Mediterranean Sea populations, has  
265 been shown to code an eLDP. The latter interacts with two proteins involved in the nervous  
266 system development, *On\_Wnt5* and *On\_Lam $\beta$ 1* (Figure 6), notably important in axon  
267 guidance [26, 27]. Therefore, through its protein-protein interactions, *On\_LDP2* may  
268 modulate neurogenesis in males and participate in the sexual dimorphism of the *O. nana*  
269 nervous system. It has been demonstrated that *O. davisae* males have a preference for virgins

270 [28]; we could also speculate that the lateral ganglion may help in virgin-sensing of *O. nana*  
271 through the recognition of virgin-specific chemical cues.

272

### 273 **LDP-driven proteolysis is potentially linked to the male ganglion formation**

274 The explosion of LDPGs in the *O. nana* genome is unique in metazoans, and is associated  
275 with the formation of new protein structures containing proteolytic domains. Owing to the  
276 small size of the LNR domain (~40 amino acids) and the substantial polymorphism within  
277 LNR domain sequences, the deep branches of the tree are weakly supported, and the  
278 evolutionary scenario resulting in the amplification of the domain remains undetermined. Two  
279 previous studies on *O. nana* population genomics [9, 20] identified five LDPGs under natural  
280 selection, with point mutations within an LNR domain. These results reinforce the idea of an  
281 ongoing evolution of these domains, especially in *O. nana* males, and support an important  
282 role for these genes in the male biology.

283 In metazoans, LNR domains are known to be involved in extracellular PPI [29] and  
284 cleavage site-accessibility modulation [30]. Half of the eLDPs contain LNR domains only,  
285 and the other half associates with peptidases (trypsin and metalloproteinase). From the PPI  
286 network, we showed that On\_LDP1 interacts with different types of extracellular proteins  
287 involved notably in tissue structure, energy storage, and extracellular proteolysis. On the other  
288 hand, transcriptomic analyses showed an enrichment of extracellular trypsins in adult males  
289 (Figure 4C). This information supports the lysis of extracellular proteins in males involving  
290 complex protein interactions between eLDPs and trypsins. From our transcriptomic results on  
291 the expression of LDPs and nervous system genes, we hypothesize that the LDPs may play a  
292 role in the development of the male-specific ganglion by guiding proteolysis of the  
293 extracellular matrix around the ganglion. This lysis may help and guide the development of  
294 new neurites and the formation of synapses by preserving other anatomical structures.

295 However, our study lacks a comprehensive or precise view of the function of the LDPs, due to  
296 the labor and time needed to optimize protocols for functional analysis on non-model species.  
297 Indeed, several RNAi assays were performed during this study without success due to the  
298 death of transfected individuals. However further investigations and methodological  
299 developments may help to validate our hypothesis of the role of LDPs in the neural  
300 development of *O. nana* male-specific lateral ganglion.

301

## 302 **Conclusions**

303 The hyper-motility of *O. nana* ZZ males and their faculty to find females could be one of the  
304 factors of the ecological success of *O. nana*, and explain the observed female-dominated sex  
305 ratio over a fifteen year course in the Toulon Little Bay. The male-specific nervous ganglion  
306 may play a role in its sexual behavior, the development of which was linked at the  
307 transcriptomic and protein levels to LDPGs, which seem to play an important role in the  
308 male-specific neurogenesis and proteolysis. The presence of LDPGs in other *Oithona* species  
309 should be investigated to better understand the evolution and role of these genes in other  
310 cyclopoid species.

## 311 **Abbreviations**

312 BIC: Bayesian information criterion  
313 CNS: Central Nervous System HMM: Hidden Markov Model  
314 LDP: LNR Domain-containing Protein  
315 LDPG: LNR domain-containing Protein coding Gene  
316 LNR: Lin12 Notch Repeat  
317 ORF: Open Reading Frame  
318 Y2H: Yeast two hybrid  
319 PPI: Protein-protein interaction  
320 IGFBP7: Insulin-like Growth Factor Binding Protein 7

321

## 322 **Methods**

### 323 **Sex ratio in the Toulon Little Bay**

324 *Oithona nana* specimens were sampled on the East side of the Toulon Little Bay, France (Lat.  
325 43° 06' 52.1" N, Long. 05° 55' 42.7" E) which is not a protected area and does not require any  
326 permission to catch plankton according to local laws and regulations  
327 [http://www.var.gouv.fr/IMG/pdf/2017\\_16\\_ap\\_reglementant\\_la\\_navigation\\_le\\_mouillage\\_la\\_](http://www.var.gouv.fr/IMG/pdf/2017_16_ap_reglementant_la_navigation_le_mouillage_la_baignade_et_la_plongee_dans_les_eaux_maritimes_de_la_rade_de_toulon.pdf)  
328 [baignade\\_et\\_la\\_plongee\\_dans\\_les\\_eaux\\_maritimes\\_de\\_la\\_rade\\_de\\_toulon.pdf](http://www.var.gouv.fr/IMG/pdf/2017_16_ap_reglementant_la_navigation_le_mouillage_la_baignade_et_la_plongee_dans_les_eaux_maritimes_de_la_rade_de_toulon.pdf). The samples  
329 were collected from the upper water layer (0–10 m) using zooplankton nets with a mesh of 90  
330 and 200 µm. Samples were preserved in 5% formaldehyde. The monitoring of *O. nana* in  
331 Toulon Little Bay was performed monthly from 2002 to 2017. Individuals of both sexes were  
332 identified and counted under a stereomicroscope.

333

#### 334 **Immunofluorescence analysis**

335 Adult individuals of both sexes collected in June, 2017 were isolated under a  
336 stereomicroscope and washed in 0.5X PBST, and incubated for 72 h at room temperature with  
337 rabbit β3-tubulin antibody (ab179513, 1:100) and 100 µl normal donkey serum (d9663). After  
338 washing with PBST, the individuals were incubated for 72 h with cy3 goat anti-rabbit  
339 conjugated Ig-antibody (AB2338000, 1:200, Jackson ImmunoResearch Laboratory) and  
340 normal donkey serum. Individuals were then washed with PBST and mounted on slides and  
341 microslides with Citifluor mounting solution (AF87). A similar protocol was used to label  
342 other individuals for α-tubulin using rabbit α-tubulin antibody (ab15446, 1:100). Observations  
343 were made on an Olympus BX43 fluorescence microscope, and images were taken with  
344 Toupview, then labeled with Inkscape 0.92.4.

345

#### 346 **Biological materials and RNA-seq experiments**



347 Plankton sampled in November, 2015 and November, 2016 in the Little Bay of Toulon,  
348 France were preserved in 70% ethanol and stored at  $-20^{\circ}\text{C}$ . The copepods were isolated under  
349 the stereomicroscope as previously described. We selected *O. nana* individuals from five  
350 different development stages: five pairs of egg-sacs, four nauplii (larvae), four copepodites  
351 (juveniles), four adult females and four adult males. All individuals were isolated from the  
352 November, 2015 sampling, except for the eggs. Each individual was isolated, then crushed  
353 with a tissue grinder (Axygen) into a 1.5 ml Eppendorf tube. Total mRNAs were extracted  
354 with the NucleoSpin RNA XS kit (Macherey-Nagel) following the manufacturer's  
355 instructions, then quantified on a Qubit 2.0 with the RNA HS Assay kit (ThermoFisher  
356 Scientific); quality was assessed on a Bioanalyzer 2100 with the RNA 6000 Pico Assay kit  
357 (Agilent). cDNAs were constructed using the SMARTer v4 Ultra low Input RNA kit  
358 (Takara). After cDNA shearing using a Covaris E210 instrument, Illumina libraries were  
359 constructed using the NEBNext Ultra II kit (New England Biolabs) and sequenced on an  
360 Illumina HiSeq2500. A minimum of  $9.7 \times 10^6$  reads pairs were produced from each individual  
361 (Supplementary Notes S1).

362

### 363 **Sex-determination system identification by RNA-seq**

364 RNA-seq reads from both sexes (four females and four males) were aligned against *O. nana*  
365 genes. Reads having an alignment length lower than 80% and nucleic identity lower than 97%  
366 were removed. The variant calling step was performed with the “*samtools mpileup*” and  
367 “*bcftools call*” commands, with default parameters [31], and only bi-allelic sites were kept.

368 To identify the most likely sexual system in *O. nana*, we used *SD-pop* [32]. Just like  
369 its predecessor *SEX-DETECTOR* [33], *SD-pop* calculates the likelihood of three sexual models  
370 (the absence of sex chromosomes, the XY system, or the ZW system), which can be  
371 compared using the Bayesian information criterion. *SD-pop* is based on population genetics

372 (i.e., Hardy-Weinberg equilibrium for autosomal genes, and different equilibria for sex-linked  
373 genes) instead of Mendelian transmission from parents to offspring, and thus can be used  
374 without the requirement of a controlled cross.

375         The number of individuals used (four for each sex) is close to the lower limit for *SD*-  
376 *pop*, where the robustness of the method is weakening. To test whether the model preferred by  
377 *SD-pop* could have been preferred purely by chance, we permuted the sex of the individuals,  
378 with the constraint of keeping four females and four males ( $(8!/(4!*4!) - 1 = 69$  permuted  
379 datasets). As the XY model is strictly equivalent to the ZW model with the sexes of all  
380 individuals changed, two *SD-pop* models (no sex chromosomes, and ZW) were run on all  
381 possible permutations of the data, and the BIC of each model was calculated. The genes  
382 inferred as sex-linked based on their posterior probability ( $>0.8$ ) were manually annotated.

383

#### 384 ***Arthropoda* phylogenetic tree**

385 The ribosomal 18S sequences from seven arthropods, including five copepods (*O. nana*,  
386 *Lepeophtheirus salmonis*, *Tigriopus californicus*, *Eurytemora affinis*, *Calanus glacialis*,  
387 *Daphnia pulex*, and *Drosophila melanogaster*) were downloaded from NCBI. The sequences  
388 were aligned with MAFFT [34] using default parameters. The nucleotide blocks conserved  
389 among the seven species were selected by Gblock on Seaview [35] and manually curated. The  
390 maximum-likelihood phylogenetic tree was constructed using PhyML 3.0 with the General  
391 Time Reversible (GTR) model and branch supports computed by the approximate likelihood  
392 ratio test (aLRT) [36].

393

#### 394 **Gene annotation**

395 The functional annotation of genes was updated from the previous genome annotation [9]  
396 using InterProScan v5.8-49.0 [37], BlastKOALA v2.1 [38], and by alignment on the NCBI  
397 non-redundant protein database using Diamond [39]. Furthermore, a list of *O. nana* genes  
398 under natural selection in the Mediterranean Sea was added based on previous population  
399 genomic analyses [20]. We further considered the annotation provided by either (i) Pfam [40]  
400 or SMART [41] protein domains, (ii) GO terms (molecular function, biological process, or  
401 cellular component) [42], (iii) KEGG pathways [43], and (iv) the presence of loci under  
402 natural selection. These four gene features were used to identify specific enrichment in a  
403 given set of genes using a hypergeometric test that estimated the significance of the  
404 intersection between a specific gene list and one of the four global annotation lists.

405

#### 406 **HMM search for LDPGs identification**

407 From the InterProScan annotation of the *O. nana* proteome, 25 LNR domain sequences were  
408 detected ( $p \leq 10^{-6}$ ), extracted, and aligned with MAFFT using default parameters [34]. A  
409 Hidden Markov Model (HMM) was generated from the aligned sequences using the  
410 “*hmmbuild*” function of the HMMER tool version 3.1b1 [44]. The *O. nana* proteome was  
411 scanned by “*hmmsearch*” using the LNR HMM profile. Detected domains were considered  
412 canonical LNR domains for *E-value*, *c-E-value*, and *i-E-value*  $< 10^{-6}$  and containing at least  
413 six cysteines, or considered as LNR-like domains for *E-value*, *c-E-value*, and *i-E-value*  
414 between  $10^{-6}$  and  $10^{-1}$  and containing at least four cysteines. A weblogo [45] was generated to  
415 represent conserved residues for three LNRs of the Notch protein, and the LNRs and LNR-  
416 like proteins detected by HMM. The LNR and LNR-like domain-containing proteins  
417 constituting the final LDP set was used for further analysis. Deep-Loc (online execution) [46]  
418 was used to determinate the cellular localization of LDPs. To detect signal peptides and

419 membrane protein topology, we used the online services of SignalP 5.0 [47] and TOPCONS  
420 [48], respectively.

421

#### 422 **Phylogeny tree of *O. nana* LNR domains**

423 The *O. nana* nucleotide sequences of the LNR and LNR-like domains were aligned using  
424 MAFFT with default parameters. The maximum-likelihood phylogenetic tree was constructed  
425 using PhyML3.0 with a model designed by the online execution of Smart Model Selection  
426 v.1.8.1 (Lefort, Longueville, and Gascuel 2017), and with branch supports computed by the  
427 aLRT method. The GTR model was used with an estimated discrete gamma distribution ( $\alpha =$   
428 1.418) and a proportion of fixed invariable sites ( $I = 0.25$ ). The tree was visualized using  
429 MEGA-X (Kumar et al. 2018).

430

#### 431 **Differential expression analysis**

432 RNA-seq reads from 20 libraries were mapped independently against the *O. nana* genes using  
433 “*bwa-mem*” (v. 0.7.15-r1140) with default parameters [49]. Read counts were extracted from  
434 the 20 BAM files with samtools (v. 1.4) [31]. Each set of reads was validated by a pairwise  
435 MA-plot to ensure a global representation of the *O. nana* transcriptome in each sample  
436 (Supplementary Notes S2). One nauplius sampled showing a biased read count distribution  
437 was discarded. Read counts from valid replicates were used as input data for the DESeq R  
438 package [50] to identify differential gene expression between the five development stages  
439 through pairwise comparisons of each developmental stage. Genes having a Benjamini-  
440 Hochberg corrected  $p$ -value  $\leq 0.05$  in one of the pairwise comparisons were considered  
441 significantly differentially expressed. To identify stage-specific genes, we selected those that  
442 were at least twice as highly expressed based on the normalized read count mean

443  $(\log_2(\text{foldChange}) > 1)$  in one development stage compared to the four others. Upregulated  
444 stage-specific genes were represented by a heatmap. The same method was used to  
445 determined downregulated stage-specific genes (with  $\log_2(\text{foldChange}) < -1$ ).

446

#### 447 **Protein-protein interaction assays by yeast two-hybrid screening**

448 Yeast two-hybrid experiments were performed using the Matchmaker Gold Yeast Two-  
449 Hybrid System (Takara). The coding sequences were first cloned into the entry vector  
450 pDONR/Zeo (ThermoFisher), and the correct ORF sequences were verified by Sanger  
451 sequencing. To this end, LDPGs were PCR-amplified with Gateway-compatible primers  
452 (Supplementary Notes S3, S4) using cDNAs of pooled male individuals as template. In the  
453 case of secreted proteins, the amplified ORF lacked the signal peptide. Then, the cloned ORFs  
454 were reamplified by a two step-PCR protocol allowing the creation of a recombination  
455 cassette containing the ORF flanked by 40-nucleotide tails homologous to the ends of the  
456 pGBKT7 bait vector at the cloning site. Linearized bait vectors and ORF cassettes were co-  
457 transformed into the Y2HGold yeast strain, and ORF cloning was performed by homologous  
458 recombination directly in yeast. Y2H screening for potential interacting partners of the bait  
459 proteins was performed via two methods: first, by directly testing pairs of candidates, and  
460 second, by testing the candidates as baits against a cDNA library obtained from a pool of total  
461 mRNAs from 100 *O. nana* male individuals cloned into pGAD-AD prey vectors.

462 Before screening, the self-activity of each bait clone was tested by mating with the  
463 Y187 strain harboring an empty pGADT7-AD vector, and then plating on SD/-His/-Leu/-Trp  
464 medium supplemented with 0, 1, 3, 5, or 10 mM 3-amino 1,2,4-triazole (3-AT). Each bait  
465 clone was then mated with the prey library containing approximately  $4 \times 10^6$  individual  
466 clones, and plated on low-stringency agar plates (SD/-Trp/-Leu/-His) supplemented with the  
467 optimal concentration of 3-AT based on the results of the self-activity test. To decrease the

468 false positive rate, after five days of growth at 30°C, isolated colonies were spotted on high-  
469 stringency agar plates (SD/-Leu/-Trp/-Ade/-His) supplemented with 3-AT and allowed to  
470 grow another five days. Colony PCR on positive clones growing on high stringency medium  
471 was performed with primers flanking the cDNA insert on the pGAD-AD vector, and PCR  
472 products were directly Sanger-sequenced.

473

## 474 **Declarations**

### 475 **Ethics approval and consent to participate**

476 Not applicable

477

### 478 **Consent for publication**

479 Not applicable

480

### 481 **Availability of data and material**

482 The *O. nana* RNA-seq data are available at ENA (*Supplementary Notes S1*) and *O. nana*  
483 samples are available upon request.

### 484 **Competing interests**

485 We declare that none of the authors have any competing of interests.

486

### 487 **Funding**

488 The CEA-Genoscope and France Génomique (grant ANR-10-INBS-09) financed the wet  
489 laboratory work, the RNA-seq sequencing and the computational cost of the bioinformatic  
490 analyses. The French Ministry of Research financed the PhD grant of Kevin Sugier.

491

### 492 **Authors' contributions**

493 KS, JP, and JLJ collected the samples; JLJ generated the sex-ratio data; KS, KL, MAM, EP,  
494 and JP generated the molecular data; RLJ, BV, and MAM performed the immunofluorescence  
495 analysis. JK performed sexual system analysis; KS, AA, LB, SK, NM, and CO performed the  
496 yeast two-hybrid analysis; AA designed the yeast two-hybrid method; KS and MAM per-

497 formed the analyses; PW provided technical facilities support; KS, AA, and MAM wrote the  
498 manuscript; MAM supervised the study. All authors have read and approved the manuscript.

499

500 **Acknowledgements**

501 We acknowledge the Commissariat à l’Energie Atomique et aux Energie Alternatives and the  
502 Agence Nationale de la Recherche

503

504

## 505 **References**

- 506 1. Huys R, Boxshall GA. Copepod evolution. Ray Society; 1991.
- 507 2. Kiørboe T. What makes pelagic copepods so successful? *J Plankton Res.* 2011;33:677–85.
- 508 3. Gallienne CP, Robins DB. Is *Oithona* the most important copepod in the world's oceans? *J Plankton*  
509 *Res.* 2001;23:1421–32.
- 510 4. Nishida S. Taxonomy and distribution of the family oithonidae (Copepoda, Cyclopoida) in the  
511 Pacific and Indian. *Bull Ocean Res Inst.* 1985;20:1–167.
- 512 5. Steinberg DK, Landry MR. Zooplankton and the Ocean Carbon Cycle. *Ann Rev Mar Sci.*  
513 2017;9:413–44.
- 514 6. Cornils A, Wend-Heckmann B, Held C. Global phylogeography of *Oithona similis* s.l. (Crustacea,  
515 Copepoda, Oithonidae) – A cosmopolitan plankton species or a complex of cryptic lineages? *Mol*  
516 *Phylogenet Evol.* 2017;107:473–85.
- 517 7. Dvoretzky VG, Dvoretzky AG. Life cycle of *Oithona similis* (Copepoda: Cyclopoida) in Kola Bay  
518 (Barents Sea). *Mar Biol.* 2009;156:1433–46.
- 519 8. Kiørboe T. Mate finding, mating, and population dynamics in a planktonic copepod *Oithona*  
520 *davisae*: There are too few males. *Limnol Oceanogr.* 2007;52:1511–22.
- 521 9. Madoui M-A, Poulain J, Sugier K, Wessner M, Noel B, Berline L, et al. New insights into global  
522 biogeography, population structure and natural selection from the genome of the epipelagic copepod  
523 *Oithona*. *Mol Ecol.* 2017;26:4467–82.
- 524 10. Mironova E, Pasternak A. Female gonad morphology of small copepods *Oithona similis* and  
525 *Microsetella norvegica*. *Polar Biol.* 2017;40:685–96.
- 526 11. Paffenhöfer G-A. On the ecology of marine cyclopoid copepods (Crustacea, Copepoda). *J*  
527 *Plankton Res.* 1993;15:37–55.
- 528 12. Sugier K, Vacherie B, Cornils A, Wincker P, Jamet J-L, Madoui M-A. Chitin distribution in the  
529 *Oithona* digestive and reproductive systems revealed by fluorescence microscopy. *PeerJ.*  
530 2018;6:e4685.
- 531 13. Zamora-Terol S, Kjellerup S, Swalethorp R, Saiz E, Nielsen TG. Population dynamics and  
532 production of the small copepod *Oithona* spp. in a subarctic fjord of West Greenland. *Polar Biol.*  
533 2014;37:953–65.
- 534 14. Zamora Terol S. Ecology of the marine copepod genus *Oithona*. Universitat Politècnica de  
535 Catalunya; 2013.
- 536 15. Richard S, Jamet J. An Unusual Distribution of *Oithona nana* GIESBRECHT ( 1892 ) (   
537 Crustacea□: Cyclopoida ) in a Bay □: The Case of Toulon Bay (France, Mediterranean Sea). *J Coast*  
538 *Res.* 2001; April 2015.
- 539 16. Temperoni B, Vinas MD, Diovisalvi N, Negri R. Seasonal production of *Oithona nana* Giesbrecht,  
540 1893 (Copepoda: Cyclopoida) in temperate coastal waters off Argentina. *J Plankton Res.*  
541 2011;33:729–40.
- 542 17. Hirst AG, Bonnet D, Conway DVPP, Kiørboe T. Does predation control adult sex ratios and  
543 longevities in marine pelagic copepods? *Limnol Oceanogr.* 2010;55:2193–206.
- 544 18. Kiørboe T. Sex, sex-ratios, and the dynamics of pelagic copepod populations. *Oecologia.*  
545 2006;148:40–50.
- 546 19. Voordouw MJ, Anholt BR. Environmental sex determination in a splash pool copepod. *Biol J Linn*  
547 *Soc.* 2002;76:511–20.
- 548 20. Arif M, Gauthier J, Sugier K, Iudicone D, Jaillon O, Wincker P, et al. Discovering Millions of



- 549 Plankton Genomic Markers from the Atlantic Ocean and the Mediterranean Sea. *Mol Ecol Resour.*  
550 2019;19:0–3.
- 551 21. Liao TSV, Call GB, Guptan P, Cespedes A, Marshall J, Yackle K, et al. An efficient genetic screen  
552 in *Drosophila* to identify nuclear-encoded genes with mitochondrial function. *Genetics.*  
553 2006;174:525–33.
- 554 22. Ventura T, Rosen O, Sagi A. From the discovery of the crustacean androgenic gland to the insulin-  
555 like hormone in six decades. *Gen Comp Endocrinol.* 2011;173:381–8.
- 556 23. Frase T, Richter S. The brain and the corresponding sense organs in calanoid copepods – Evidence  
557 of vestiges of compound eyes. *Arthropod Struct Dev.* 2020;54:100902.
- 558 24. Andrew DR, Brown SM, Strausfeld NJ. The minute brain of the copepod *Tigriopus californicus*  
559 supports a complex ancestral ground pattern of the tetraconate cerebral nervous systems. *J Comp*  
560 *Neurol.* 2012;520:3446–70. doi:<https://doi.org/10.1002/cne.23099>.
- 561 25. Shen K, Fetter RD, Bargmann CI. Synaptic Specificity Is Generated by the Synaptic Guidepost  
562 Protein SYG-2 and Its Receptor, SYG-1. *Cell.* 2004;116:869–81.
- 563 26. Zou Y. Wnt signaling in axon guidance. *Trends Neurosci.* 2004;27:528–32.
- 564 27. Randlett O, Poggi L, Zolessi FR, Harris WA. The oriented emergence of axons from retinal  
565 ganglion cells is directed by laminin contact in vivo. *Neuron.* 2011;70:266–80.
- 566 28. Heuschele J, Kiørboe T. The smell of virgins: mating status of females affects male swimming  
567 behaviour in *Oithona davisae*. *J Plankton Res.* 2012;34:929–35. doi:10.1093/plankt/fbs054.
- 568 29. Boldt HB, Conover CA. Pregnancy-associated plasma protein-A (PAPP-A): A local regulator of  
569 IGF bioavailability through cleavage of IGFBPs. *Growth Horm IGF Res.* 2007;17:10–8.
- 570 30. Sanchez-Irizarry C, Carpenter AC, Weng AP, Pear WS, Aster JC, Blacklow SC. Notch Subunit  
571 Heterodimerization and Prevention of Ligand-Independent Proteolytic Activation Depend,  
572 Respectively, on a Novel Domain and the LNR Repeats. *Mol Cell Biol.* 2004;24:9265–73.
- 573 31. Li H, Handsaker B, Wysoker A, Fennell T, Ruan J, Homer N, et al. The Sequence Alignment/Map  
574 format and SAMtools. *Bioinformatics.* 2009;25:2078–9.
- 575 32. Käfer J, Lartillot N, Marais GAB, Picard F. Detecting sex-linked genes using genotyped  
576 individuals sampled in natural populations. *bioRxiv.* 2020;:2020.01.31.928291.  
577 doi:10.1101/2020.01.31.928291.
- 578 33. Muyle A, Käfer J, Zemp N, Mousset S, Picard F, Marais GAB. Sex-detector: A probabilistic  
579 approach to study sex chromosomes in non-model organisms. *Genome Biol Evol.* 2016;8:2530–43.
- 580 34. Katoh K, Standley DM. MAFFT multiple sequence alignment software version 7: improvements  
581 in performance and usability. *Mol Biol Evol.* 2013;30:772–80.
- 582 35. Gouy M, Guindon S, Gascuel O. SeaView Version 4: A Multiplatform Graphical User Interface  
583 for Sequence Alignment and Phylogenetic Tree Building. *Mol Biol Evol.* 2010;27:221–4.
- 584 36. Guindon S, Dufayard J-F, Lefort V, Anisimova M, Hordijk W, Gascuel O. New Algorithms and  
585 Methods to Estimate Maximum-Likelihood Phylogenies: Assessing the Performance of PhyML 3.0.  
586 *Syst Biol.* 2010;59:307–21.
- 587 37. Jones P, Binns D, Chang H-Y, Fraser M, Li W, McAnulla C, et al. InterProScan 5: genome-scale  
588 protein function classification. *Bioinformatics.* 2014;30:1236–40.
- 589 38. Kanehisa M, Sato Y, Morishima K. BlastKOALA and GhostKOALA: KEGG Tools for Functional  
590 Characterization of Genome and Metagenome Sequences. *J Mol Biol.* 2016;428:726–31.
- 591 39. Buchfink B, Xie C, Huson DH. Fast and sensitive protein alignment using DIAMOND. *Nat*  
592 *Methods.* 2015;12:59–60.
- 593 40. Finn RD, Bateman A, Clements J, Coghill P, Eberhardt RY, Eddy SR, et al. Pfam: the protein

- 594 families database. *Nucleic Acids Res.* 2014;42.
- 595 41. Letunic I, Bork P. 20 years of the SMART protein domain annotation resource. *Nucleic Acids Res.*  
596 2018;46:D493–6.
- 597 42. Ashburner M, Ball CA, Blake JA, Botstein D, Butler H, Cherry JM, et al. Gene ontology: tool for  
598 the unification of biology. The Gene Ontology Consortium. *Nat Genet.* 2000;25:25–9.
- 599 43. Kanehisa M, Goto S, Sato Y, Furumichi M, Tanabe M. KEGG for integration and interpretation of  
600 large-scale molecular data sets. *Nucleic Acids Res.* 2012;40 Database issue:D109-14.
- 601 44. Eddy SR. Accelerated Profile HMM Searches. *PLoS Comput Biol.* 2011;7:e1002195.
- 602 45. Crooks GE, Hon G, Chandonia J-M, Brenner SE. WebLogo: A Sequence Logo Generator.  
603 *Genome Res.* 2004;14:1188–90.
- 604 46. Almagro Armenteros JJ, Sønderby CK, Sønderby SK, Nielsen H, Winther O. DeepLoc: prediction  
605 of protein subcellular localization using deep learning. *Bioinformatics.* 2017;33:3387–95.
- 606 47. Almagro Armenteros JJ, Tsirigos KD, Sønderby CK, Petersen TN, Winther O, Brunak S, et al.  
607 SignalP 5.0 improves signal peptide predictions using deep neural networks. *Nat Biotechnol.*  
608 2019;37:420–3.
- 609 48. Tsirigos KD, Peters C, Shu N, Käll L, Elofsson A. The TOPCONS web server for consensus  
610 prediction of membrane protein topology and signal peptides. *Nucleic Acids Res.* 2015;43:W401-7.
- 611 49. Li H. Aligning sequence reads, clone sequences and assembly contigs with BWA-MEM. 2013.
- 612 50. Anders S, Huber W. Differential expression analysis for sequence count data. *Genome Biol.*  
613 2010;11:R106.
- 614
- 615
- 616
- 617

## 618 **Figure Legends**

619

620 **Figure 1. Life cycle and sex-ratio of the copepod *Oithona nana* in the Toulon Little Bay.**

621 **A.** Map of the sampling site in the Toulon Little Bay created with the “maps” R package 3.3.0  
622 and modified with Inkscape 0.92.4. **B.** The life cycle of *O. nana*. **C.** Sex ratio of *O. nana* from  
623 2002 to 2017 in the Toulon Little Bay. Black circles represent the monthly mean, the blue line  
624 represents the 15-year mean (0.15).

625

626 **Figure 2. Immunofluorescence of the *Oithona nana* nervous system.** **A.** Male labeled with

627  $\beta$ 3-tubulin and DAPI. **B.** Male labeled with  $\beta$ 3-tubulin and DAPI. **C.** Female labeled with  $\beta$ 3-  
628 tubulin and DAPI. **D.** Male labeled with  $\alpha$ -tubulin and DAPI. **E.** Male labeled with  $\alpha$ -tubulin  
629 and DAPI. **F.** Female labeled with  $\alpha$ -tubulin and DAPI. P: protocerebrum. D: deutocerebrum.  
630 T: tritocerebrum. SEG: suboesophageal ganglion. VNS: ventral nervous system. LG: lateral  
631 ganglion. PGF: post-ganglion fibers. a:  $\beta$ 3-tubulin-rich area. b: nuclei-rich area. ANF: afferent  
632 nerve fibers. FNE: free nerve ending

633

634 **Figure 3. Lin-12 Notch Repeat (LNR) protein domain burst and domain associations in**  
635 **the *Oithona nana* proteome.** **A.** Phylogeny of five copepod species and two other arthropod

636 species based on 18S ribosomal sequences. The numbers at internal branches show aLRT  
637 branch support. The scale bar represents the nucleotide substitution rate. **B.** LNR domain  
638 occurrences in seven Arthropoda proteomes, detected by HMM. The number at the front of  
639 each bar corresponds to the number of detected genes. **C.** Consensus sequences of the *O. nana*  
640 Notch-LNR, LNR, and LNR-like domains generated by WebLogo. The asterisks represent the  
641 conserved sites. **D.** Schemata of the *O. nana* LNR and LNR-like protein structure. Numbers  
642 under each domain represent the possible occurrence range. The barplot represents the  
643 occurrence of the nine structures. **E.** Phylogenetic tree of the *O. nana* LNR and LNR-like  
644 domains. Bold branches have aLRT support  $\geq 0.90$ . The red circles represent tandem  
645 duplication.

646

647 **Figure 4. Differential expression analysis of the *Oithona nana* transcriptome.** **A.** Heatmap

648 of the 1,233 significantly differentially expressed genes in at least one of the five  
649 developmental stages. **B.** Functional annotation distribution of 445 genes explicitly  
650 overexpressed in male adults. **C.** Heatmap of the 27 significantly differentially expressed  
651 LDPGs and the composition of their protein domains. **D.** Amino acid conversion to  
652 neurotransmitters in *O. nana* males. Overexpressed enzymes in males are indicated in red,  
653 amino acids in blue, and neurotransmitter amino acids in green.

654

655 **Figure 5. Protein-protein interaction of LNR-containing proteins in the *O. nana* male**

656 **proteome.** **A.** Structure and expression of the PPI candidates. The red arrows represent PCR  
657 primers. **B.** PPI network of LDPGs obtained by Yeast two-hybrid assays. Lam $\beta$ 1: Laminin  
658 subunit beta 1. Vtg2: Vitellogenin 2. PUF: protein of unknown function. **C.** RPKM-  
659 normalized expression in the five developmental stages. From left to right: egg (e), larva (l),  
660 juvenile (j), adult female (f), adult male (m).

661

662 **Figure 6. Hypothesis of the sensory role of the lateral ganglion in female search and the**  
663 **role of LDP-driven proteolysis.** Red arrows represent protein-protein interactions found in  
664 this study. Blue arrows indicate enzymatic activities. Green circles represent overexpressed  
665 genes in males involved in the nervous system that were detected in this study. Dotted arrows  
666 indicate signaling pathways.

667

668 Supplementary Notes S1: Transcriptomic data.

669 Supplementary Notes S2: Transcriptomic data quality.

670 Supplementary Notes S3: Experimental design of the protein-protein interaction (PPI)  
671 analysis.

672 Supplementary Notes S4: Primers used for PCR amplification.

673 Supplementary Notes S5. Gene annotation of the sex-determination system-associated genes  
674 of *Oithona nana*.

675 Supplementary Notes S6: Structure and localization of the *Oithona nana* LDPs.

676 Supplementary Notes S7: Functional annotation of *O. nana* genes overexpressed in males.

677 Supplementary Notes S8: Phylogenetic tree of On\_IGFBP7.

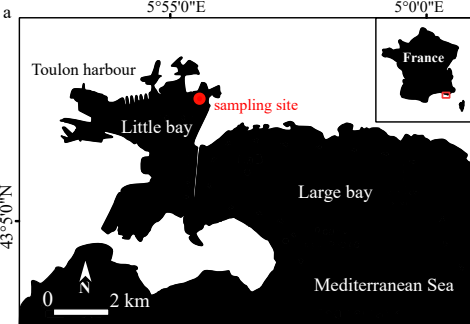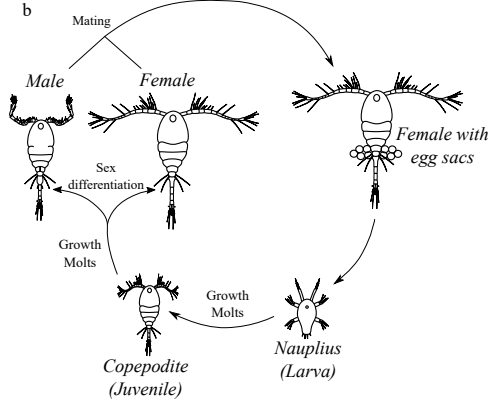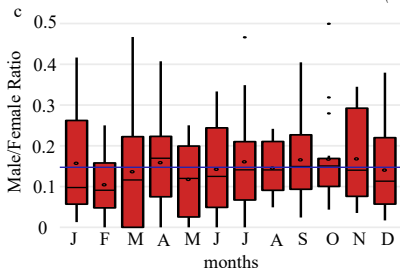

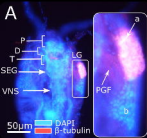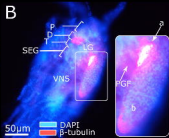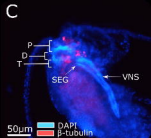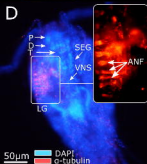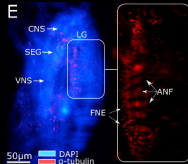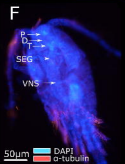

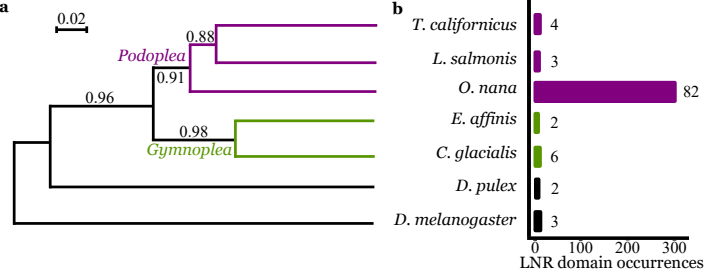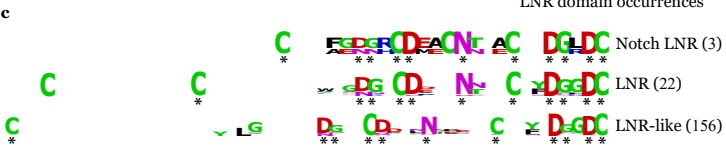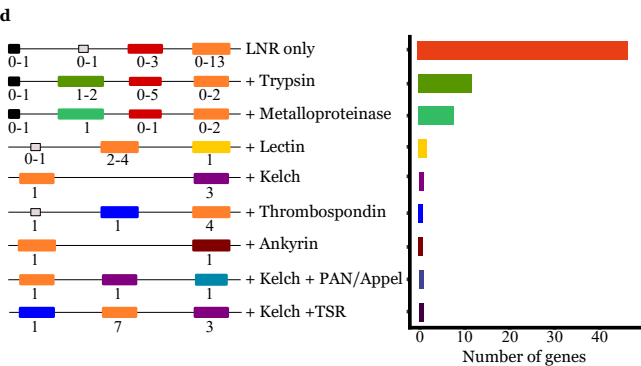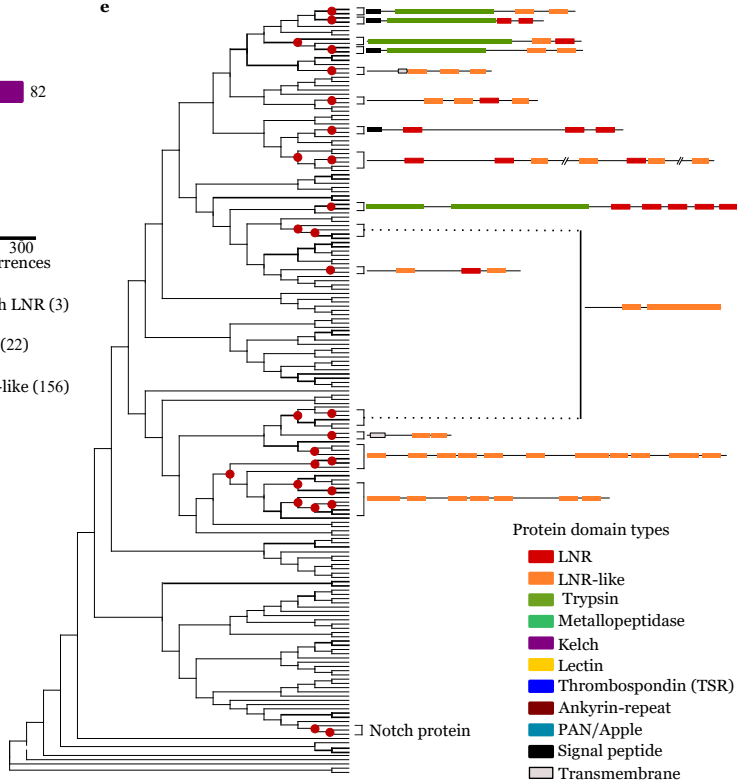

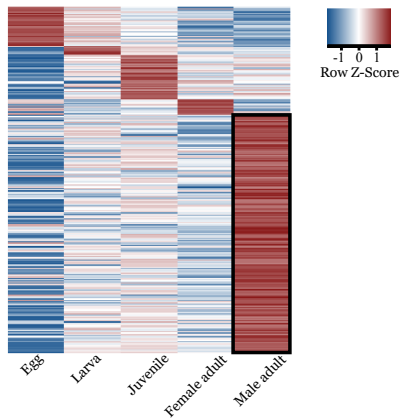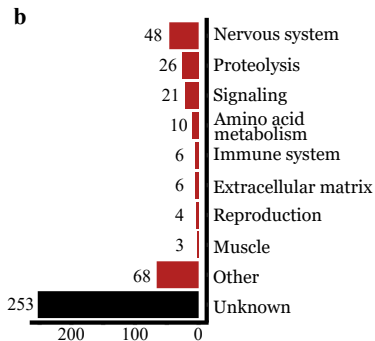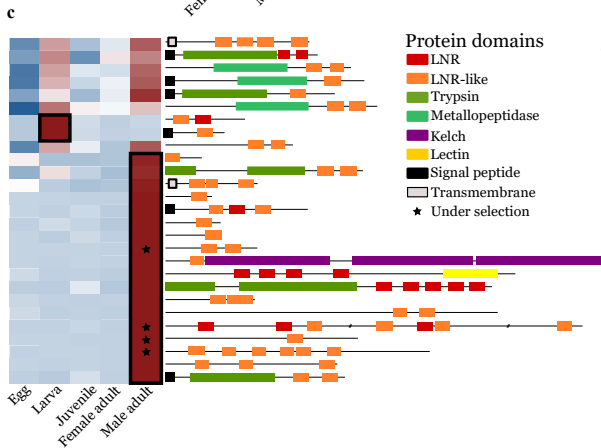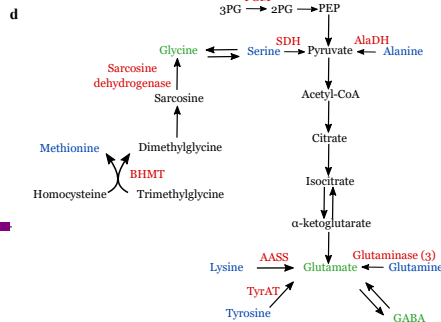



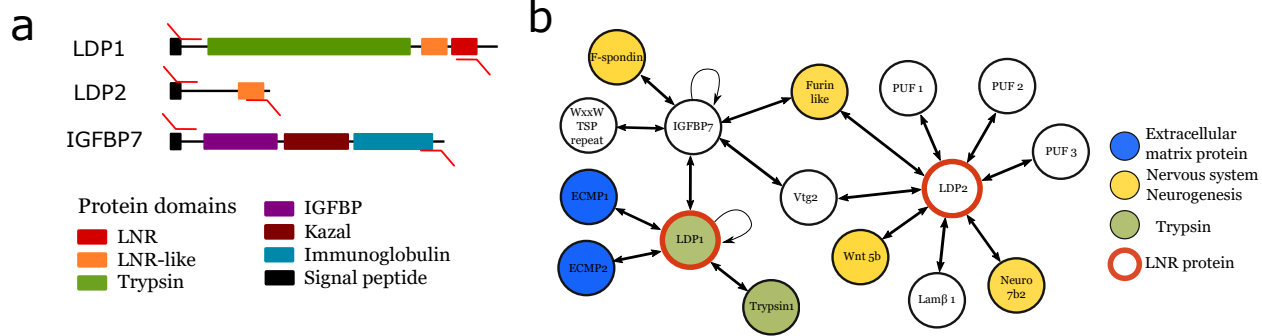

**c**

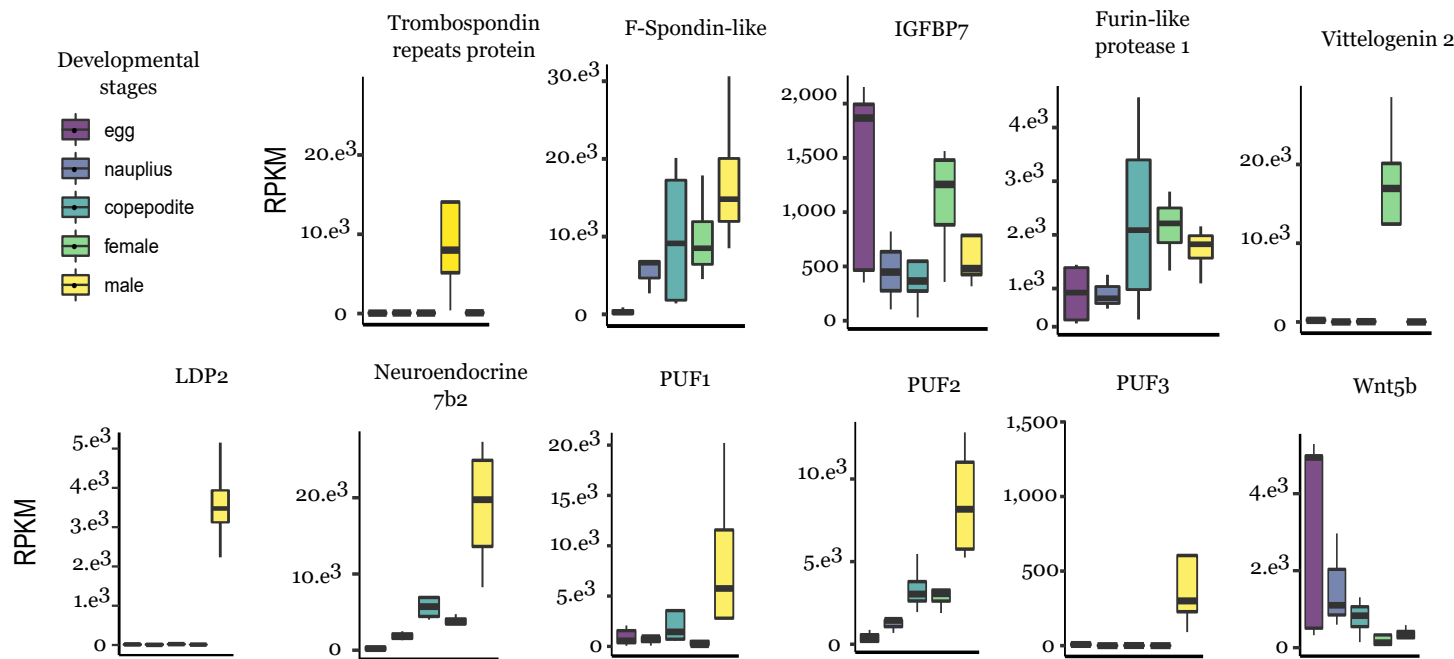

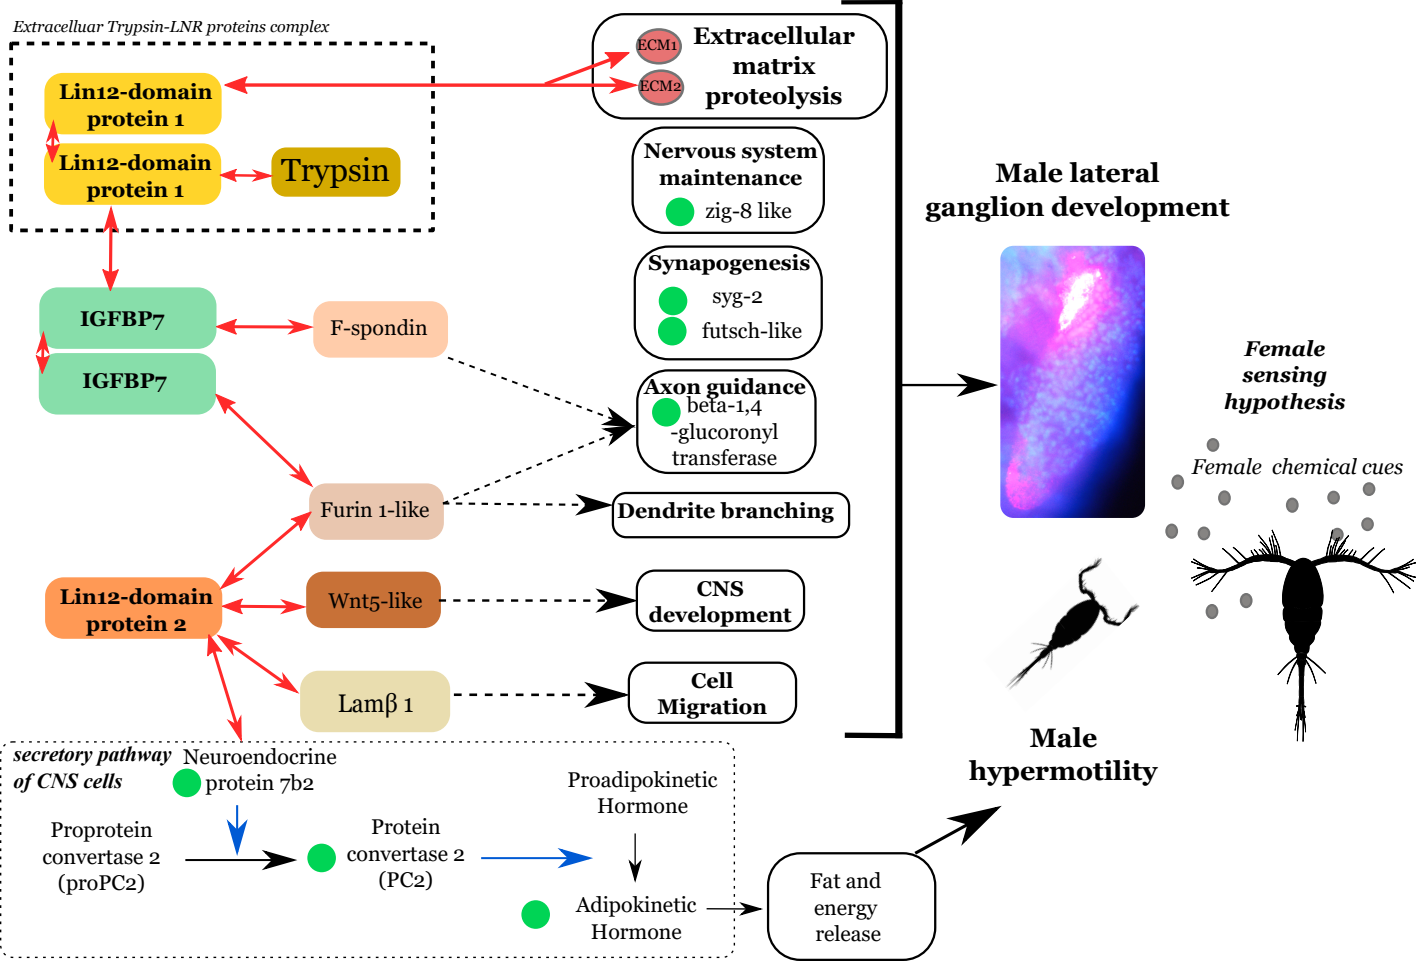

Source: http://biorxiv.org/content/10.1101/2021.05.07.443100v1.full.pdf
